# Supplementary material for: Variable Light Condition Improves Root Distribution Shallowness and P Uptake of Soybean in Maize/Soybean Relay Strip Intercropping System
Source: MDPI journal article supplement (doi:10.3390/plants9091204), 2020-09-15
Supplement: s1 [file s1]

Fig. S1

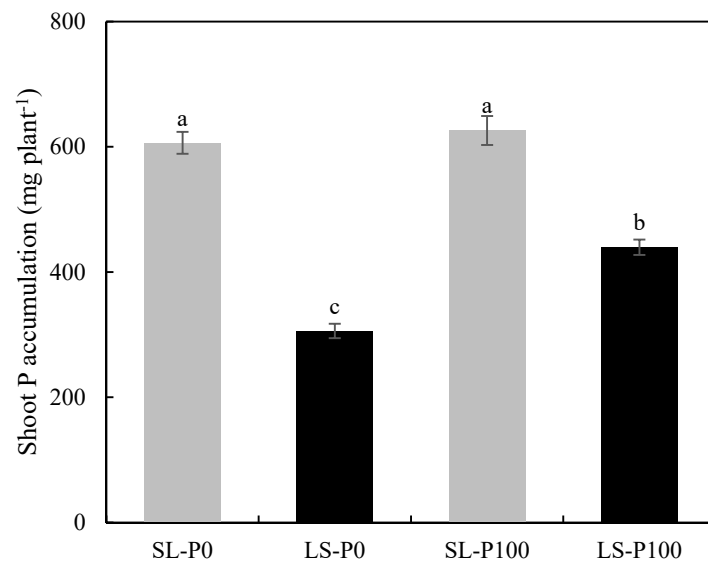

SFig. 1 The shoot P accumulation as affected by the P application and light condition in the pot experiment. Plants were grown in two light treatments (SL: planting to V5 stage under shade condition, V5-R8 in natural light condition; LS: planting to V5 stage under natural light condition, V5-R8 under shade condition) and two P application treatments (P0: with zero P application; P100: with 100 mg P kg<sup>-1</sup> soil application). Data are averages of three replicates and bars represent standard errors. Data with different letters are significantly different by LSD ( $p \leq 0.05$ ).

Fig. S2

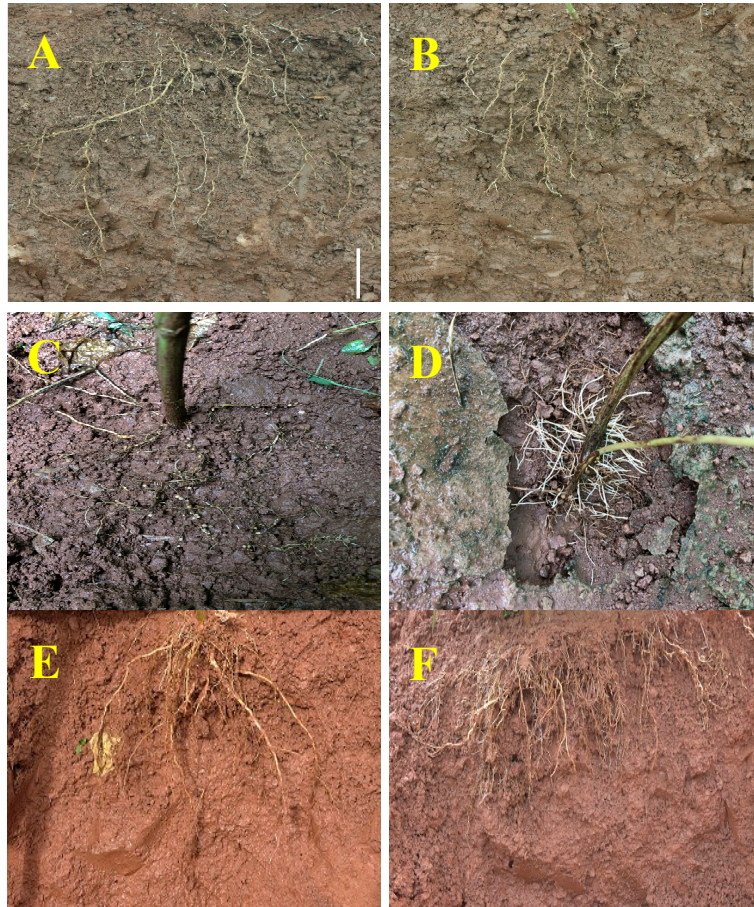

Fig. S2 Effect of cropping system on the root morphology and distribution (A: monocropped soybean at V5 stage; B: intercropped soybean at V5 stage; C: monocropped soybean root in the topsoil at R3 stage; D: intercropped soybean root in the topsoil at R3 stage; E: monocropped soybean root belowground at R3 stage; F: intercropped soybean root belowground at R3 stage;) in the field experiment.

**Table S1** The dry matter and shoot P accumulation ( $\text{g m}^{-2}$ ) of soybean during the growth period as affected by P application and cropping system in the field experiment.

| Measurements | P rate | V5      |         | R3      |         | R3/V5  |        |
|--------------|--------|---------|---------|---------|---------|--------|--------|
|              |        | Inter.  | Mono.   | Inter.  | Mono.   | Inter. | Mono.  |
| Dry matter   | P0     | 13.3 c  | 34.8 b  | 273.3 d | 428.1 b | 20.6 a | 12.3 b |
|              | P20    | 14.9 c  | 50.5 a  | 352.4 c | 497.4 a | 23.7 a | 9.9 b  |
| Shoot P      | P0     | 0.022 d | 0.058 b | 0.563 c | 0.843 b | 26.1 a | 14.5 b |
|              | P20    | 0.039 c | 0.113 a | 0.891 b | 0.983 a | 23.1 a | 8.7 c  |

Plants were grown in intercropping (Inter.) and monocropping (Mono.) systems with two P application rates (P0: with zero P supply; P20: with 20 kg P  $\text{ha}^{-1}$  supply). Data are average of three replicates. Values followed by the same lowercase letters are not significantly different between sole and intercropping cropping system within the same P rate in one year at the 5% level by LSD.
